# Supplementary material for: Analysis of Indian SARS-CoV-2 Genomes Reveals Prevalence of D614G Mutation in Spike Protein Predicting an Increase in Interaction With TMPRSS2 and Virus Infectivity
Source: Front Microbiol. 2020 Nov 23;11:594928. doi: 10.3389/fmicb.2020.594928 (PMC7732478; doi:10.3389/fmicb.2020.594928)
Supplement: Supplementary Table 2 — Accession ids of GISAID submissions. [file Table_2.XLSX]

## Sheet: Supplementary_Table1
Virus name	Accession ID	Collection date	Location	Host	Passage	Sequencing technology	Assembly method	Lineage
hCoV-19/India/RMRC25/2020	EPI_ISL_455308	2020-04-04	Asia / India / Odisha	Human	Original	Illumina NextSeq 550	Reference based	B.1
hCoV-19/India/RMRC26/2020	EPI_ISL_455309	2020-04-04	Asia / India / Odisha	Human	Original	Illumina NextSeq 550	Reference based	B.1
hCoV-19/India/RMRC48/2020	EPI_ISL_455310	2020-04-08	Asia / India / Odisha	Human	Original	Illumina NextSeq 550	Reference based	B.1
hCoV-19/India/RMRC123/2020	EPI_ISL_455311	2020-05-07	Asia / India / Odisha	Human	Original	Illumina NextSeq 550	Reference based	B.1.1
hCoV-19/India/RMRC49/2020	EPI_ISL_455478	2020-04-09	Asia / India / Odisha	Human	Original	Illumina Nextseq 550	Reference based	B.1.36
hCoV-19/India/RMRC103/2020	EPI_ISL_455749	2020-05-06	Asia / India / Odisha	Human	Original	Illumina NextSeq 550	Reference based	A.7
hCoV-19/India/RMRC104/2020	EPI_ISL_455750	2020-05-06	Asia / India / Odisha	Human	Original	Illumina NextSeq 550	Reference based	B.6
hCoV-19/India/RMRC106/2020	EPI_ISL_455751	2020-05-06	Asia / India / Odisha	Human	Original	Illumina NextSeq 550	Reference based	A.7
hCoV-19/India/RMRC108/2020	EPI_ISL_455752	2020-05-06	Asia / India / Odisha	Human	Original	Illumina NextSeq 550	Reference based	A.7
hCoV-19/India/RMRC110/2020	EPI_ISL_455753	2020-05-06	Asia / India / Odisha	Human	Original	Illumina NextSeq 550	Reference based	A.7
hCoV-19/India/RMRC112/2020	EPI_ISL_455754	2020-05-06	Asia / India / Odisha	Human	Original	Illumina NextSeq 550	Reference based	B.1.80
hCoV-19/India/RMRC154/2020	EPI_ISL_455755	2020-05-07	Asia / India / Odisha	Human	Original	Illumina NextSeq 550	Reference based	B.1
hCoV-19/India/RMRC155/2020	EPI_ISL_455756	2020-05-07	Asia / India / Odisha	Human	Original	Illumina NextSeq 550	Reference based	B.1
hCoV-19/India/RMRC156/2020	EPI_ISL_455757	2020-05-07	Asia / India / Odisha	Human	Original	Illumina NextSeq 550	Reference based	B.1
hCoV-19/India/RMRC157/2020	EPI_ISL_455758	2020-05-07	Asia / India / Odisha	Human	Original	Illumina NextSeq 550	Reference based	A.7
hCoV-19/India/RMRC158/2020	EPI_ISL_455759	2020-05-07	Asia / India / Odisha	Human	Original	Illumina NextSeq 550	Reference based	A.7
hCoV-19/India/RMRC159/2020	EPI_ISL_455760	2020-05-07	Asia / India / Odisha	Human	Original	Illumina NextSeq 550	Reference based	A.7
hCoV-19/India/RMRC160/2020	EPI_ISL_455761	2020-05-07	Asia / India / Odisha	Human	Original	Illumina NextSeq 550	Reference based	A.7
hCoV-19/India/RMRC162/2020	EPI_ISL_455762	2020-05-07	Asia / India / Odisha	Human	Original	Illumina NextSeq 550	Reference based	A.7
hCoV-19/India/RMRC163/2020	EPI_ISL_455763	2020-05-07	Asia / India / Odisha	Human	Original	Illumina NextSeq 550	Reference based	A.7
hCoV-19/India/RMRC164/2020	EPI_ISL_455764	2020-05-07	Asia / India / Odisha	Human	Original	Illumina NextSeq 550	Reference based	A.7
hCoV-19/India/RMRC165/2020	EPI_ISL_455765	2020-05-07	Asia / India / Odisha	Human	Original	Illumina NextSeq 550	Reference based	B.1.80
hCoV-19/India/RMRC166/2020	EPI_ISL_455766	2020-05-07	Asia / India / Odisha	Human	Original	Illumina NextSeq 550	Reference based	A.7
hCoV-19/India/RMRC167/2020	EPI_ISL_455767	2020-05-07	Asia / India / Odisha	Human	Original	Illumina NextSeq 550	Reference based	A.7
hCoV-19/India/RMRC169/2020	EPI_ISL_455768	2020-05-07	Asia / India / Odisha	Human	Original	Illumina NextSeq 550	Reference based	B.6
hCoV-19/India/RMRC170/2020	EPI_ISL_455769	2020-05-07	Asia / India / Odisha	Human	Original	Illumina NextSeq 550	Reference based	A.7
hCoV-19/India/RMRC171/2020	EPI_ISL_455770	2020-05-07	Asia / India / Odisha	Human	Original	Illumina NextSeq 550	Reference based	A.7
hCoV-19/India/RMRC2/2020	EPI_ISL_455771	2020-03-19	Asia / India / Odisha	Human	Original	Illumina NextSeq 550	Reference based	B.1.1
hCoV-19/India/RMRC20/2020	EPI_ISL_455772	2020-04-02	Asia / India / Odisha	Human	Original	Illumina NextSeq 550	Reference based	B.1.1
hCoV-19/India/RMRC22/2020	EPI_ISL_455773	2020-04-04	Asia / India / Odisha	Human	Original	Illumina NextSeq 550	Reference based	B.1
hCoV-19/India/RMRC23/2020	EPI_ISL_455774	2020-04-04	Asia / India / Odisha	Human	Original	Illumina NextSeq 550	Reference based	B.1.36
hCoV-19/India/RMRC24/2020	EPI_ISL_455775	2020-04-04	Asia / India / Odisha	Human	Original	Illumina NextSeq 550	Reference based	B.1.36
hCoV-19/India/RMRC27/2020	EPI_ISL_455776	2020-04-04	Asia / India / Odisha	Human	Original	Illumina NextSeq 550	Reference based	B.1.36
hCoV-19/India/RMRC28/2020	EPI_ISL_455777	2020-04-04	Asia / India / Odisha	Human	Original	Illumina NextSeq 550	Reference based	B.1.36
hCoV-19/India/RMRC30/2020	EPI_ISL_455778	2020-04-04	Asia / India / Odisha	Human	Original	Illumina NextSeq 550	Reference based	B.1.36
hCoV-19/India/RMRC38/2020	EPI_ISL_455779	2020-04-04	Asia / India / Odisha	Human	Original	Illumina NextSeq 550	Reference based	B.1.36
hCoV-19/India/RMRC46/2020	EPI_ISL_455780	2020-04-08	Asia / India / Odisha	Human	Original	Illumina NextSeq 550	Reference based	B.1.36
hCoV-19/India/RMRC47/2020	EPI_ISL_455781	2020-04-08	Asia / India / Odisha	Human	Original	Illumina NextSeq 550	Reference based	B.1
hCoV-19/India/RMRC5/2020	EPI_ISL_455782	2020-04-02	Asia / India / Odisha	Human	Original	Illumina NextSeq 550	Reference based	B.1.36
hCoV-19/India/RMRC6/2020	EPI_ISL_455783	2020-04-02	Asia / India / Odisha	Human	Original	Illumina NextSeq 550	Reference based	B.1.36
hCoV-19/India/RMRC7/2020	EPI_ISL_455784	2020-04-02	Asia / India / Odisha	Human	Original	Illumina NextSeq 550	Reference based	B.1.36
hCoV-19/India/RMRC84/2020	EPI_ISL_455785	2020-05-04	Asia / India / Odisha	Human	Original	Illumina NextSeq 550	Reference based	B.6
hCoV-19/India/RMRC90/2020	EPI_ISL_455786	2020-05-04	Asia / India / Odisha	Human	Original	Illumina NextSeq 550	Reference based	B.1
hCoV-19/India/RMRC92/2020	EPI_ISL_455787	2020-05-04	Asia / India / Odisha	Human	Original	Illumina NextSeq 550	Reference based	B.1
hCoV-19/India/RMRC94/2020	EPI_ISL_455788	2020-05-04	Asia / India / Odisha	Human	Original	Illumina NextSeq 550	Reference based	B.6
hCoV-19/India/ILSCV11165/2020	EPI_ISL_463010	2020-05-07	Asia / India / Odisha	Human	Original	Illumina NextSeq 550	Reference based	B.6
hCoV-19/India/ILSCV11171/2020	EPI_ISL_463011	2020-05-07	Asia / India / Odisha	Human	Original	Illumina NextSeq 550	Reference based	B.6
hCoV-19/India/ILSCV11996/2020	EPI_ISL_463012	2020-05-09	Asia / India / Odisha	Human	Original	Illumina NextSeq 550	Reference based	B.1.1
hCoV-19/India/ILSCV12742/2020	EPI_ISL_463013	2020-05-09	Asia / India / Odisha	Human	Original	Illumina NextSeq 550	Reference based	B.6
hCoV-19/India/ILSCV12743/2020	EPI_ISL_463014	2020-05-09	Asia / India / Odisha	Human	Original	Illumina NextSeq 550	Reference based	B.6
hCoV-19/India/ILSCV12744/2020	EPI_ISL_463015	2020-05-09	Asia / India / Odisha	Human	Original	Illumina NextSeq 550	Reference based	B.1
hCoV-19/India/ILSCV12751/2020	EPI_ISL_463016	2020-05-09	Asia / India / Odisha	Human	Original	Illumina NextSeq 550	Reference based	B.1.1
hCoV-19/India/ILSCV12752/2020	EPI_ISL_463017	2020-05-09	Asia / India / Odisha	Human	Original	Illumina NextSeq 550	Reference based	B.6
hCoV-19/India/ILSCV12762/2020	EPI_ISL_463018	2020-05-09	Asia / India / Odisha	Human	Original	Illumina NextSeq 550	Reference based	B.6
hCoV-19/India/ILSCV13676/2020	EPI_ISL_463019	2020-05-09	Asia / India / Odisha	Human	Original	Illumina NextSeq 550	Reference based	B.6
hCoV-19/India/ILSCV13678/2020	EPI_ISL_463020	2020-05-09	Asia / India / Odisha	Human	Original	Illumina NextSeq 550	Reference based	B.6
hCoV-19/India/ILSCV13695/2020	EPI_ISL_463021	2020-05-09	Asia / India / Odisha	Human	Original	Illumina NextSeq 550	Reference based	B.6
hCoV-19/India/ILSCV13715/2020	EPI_ISL_463022	2020-05-09	Asia / India / Odisha	Human	Original	Illumina NextSeq 550	Reference based	B.6
hCoV-19/India/ILSCV13744/2020	EPI_ISL_463023	2020-05-09	Asia / India / Odisha	Human	Original	Illumina NextSeq 550	Reference based	B.6
hCoV-19/India/ILSCV13907/2020	EPI_ISL_463024	2020-05-10	Asia / India / Odisha	Human	Original	Illumina NextSeq 550	Reference based	A.7
hCoV-19/India/ILSCV13921/2020	EPI_ISL_463025	2020-05-10	Asia / India / Odisha	Human	Original	Illumina NextSeq 550	Reference based	B.6
hCoV-19/India/ILSCV13929/2020	EPI_ISL_463026	2020-05-10	Asia / India / Odisha	Human	Original	Illumina NextSeq 550	Reference based	A.7
hCoV-19/India/ILSCV14004/2020	EPI_ISL_463027	2020-05-09	Asia / India / Odisha	Human	Original	Illumina NextSeq 550	Reference based	B.1
hCoV-19/India/ILSCV14244/2020	EPI_ISL_463028	2020-05-10	Asia / India / Odisha	Human	Original	Illumina NextSeq 550	Reference based	B.6
hCoV-19/India/ILSCV14262/2020	EPI_ISL_463029	2020-05-11	Asia / India / Odisha	Human	Original	Illumina NextSeq 550	Reference based	A
hCoV-19/India/ILSCV14289/2020	EPI_ISL_463030	2020-05-11	Asia / India / Odisha	Human	Original	Illumina NextSeq 550	Reference based	A
hCoV-19/India/ILSCV14374/2020	EPI_ISL_463031	2020-05-10	Asia / India / Odisha	Human	Original	Illumina NextSeq 550	Reference based	B.6
hCoV-19/India/ILSCV14743/2020	EPI_ISL_463032	2020-05-10	Asia / India / Odisha	Human	Original	Illumina NextSeq 550	Reference based	B.1.79
hCoV-19/India/ILSCV14831/2020	EPI_ISL_463033	2020-05-10	Asia / India / Odisha	Human	Original	Illumina NextSeq 550	Reference based	A.9
hCoV-19/India/ILSCV14847/2020	EPI_ISL_463034	2020-05-10	Asia / India / Odisha	Human	Original	Illumina NextSeq 550	Reference based	A.9
hCoV-19/India/ILSCV15546/2020	EPI_ISL_463035	2020-05-11	Asia / India / Odisha	Human	Original	Illumina NextSeq 550	Reference based	B.1.1.32
hCoV-19/India/ILSCV15547/2020	EPI_ISL_463036	2020-05-11	Asia / India / Odisha	Human	Original	Illumina NextSeq 550	Reference based	B.1.1.32
hCoV-19/India/ILSCV15552/2020	EPI_ISL_463037	2020-05-11	Asia / India / Odisha	Human	Original	Illumina NextSeq 550	Reference based	B.1.1.32
hCoV-19/India/ILSCV15907/2020	EPI_ISL_463038	2020-05-11	Asia / India / Odisha	Human	Original	Illumina NextSeq 550	Reference based	B.6
hCoV-19/India/ILSCV15917/2020	EPI_ISL_463039	2020-05-11	Asia / India / Odisha	Human	Original	Illumina NextSeq 550	Reference based	B.1
hCoV-19/India/ILSCV15918/2020	EPI_ISL_463040	2020-05-11	Asia / India / Odisha	Human	Original	Illumina NextSeq 550	Reference based	B.1
hCoV-19/India/ILSCV15937/2020	EPI_ISL_463041	2020-05-11	Asia / India / Odisha	Human	Original	Illumina NextSeq 550	Reference based	B.6
hCoV-19/India/ILSCV16009/2020	EPI_ISL_463042	2020-05-11	Asia / India / Odisha	Human	Original	Illumina NextSeq 550	Reference based	B.1.1
hCoV-19/India/ILSCV16012/2020	EPI_ISL_463043	2020-05-11	Asia / India / Odisha	Human	Original	Illumina NextSeq 550	Reference based	A
hCoV-19/India/ILSCV16280/2020	EPI_ISL_463044	2020-05-11	Asia / India / Odisha	Human	Original	Illumina NextSeq 550	Reference based	A
hCoV-19/India/ILSCV16494/2020	EPI_ISL_463045	2020-05-12	Asia / India / Odisha	Human	Original	Illumina NextSeq 550	Reference based	B.6
hCoV-19/India/ILSCV16495/2020	EPI_ISL_463046	2020-05-12	Asia / India / Odisha	Human	Original	Illumina NextSeq 550	Reference based	B.6
hCoV-19/India/ILSCV16498/2020	EPI_ISL_463047	2020-05-12	Asia / India / Odisha	Human	Original	Illumina NextSeq 550	Reference based	B.6
hCoV-19/India/ILSCV16508/2020	EPI_ISL_463048	2020-05-12	Asia / India / Odisha	Human	Original	Illumina NextSeq 550	Reference based	B.6
hCoV-19/India/ILSCV16509/2020	EPI_ISL_463049	2020-05-12	Asia / India / Odisha	Human	Original	Illumina NextSeq 550	Reference based	B.6
hCoV-19/India/ILSCV16510/2020	EPI_ISL_463050	2020-05-12	Asia / India / Odisha	Human	Original	Illumina NextSeq 550	Reference based	B.6
hCoV-19/India/ILSCV16512/2020	EPI_ISL_463051	2020-05-12	Asia / India / Odisha	Human	Original	Illumina NextSeq 550	Reference based	B.6
hCoV-19/India/ILSCV16514/2020	EPI_ISL_463052	2020-05-12	Asia / India / Odisha	Human	Original	Illumina NextSeq 550	Reference based	B.1.1.32
hCoV-19/India/ILSCV16631/2020	EPI_ISL_463053	2020-05-12	Asia / India / Odisha	Human	Original	Illumina NextSeq 550	Reference based	B.6
hCoV-19/India/ILSCV16809/2020	EPI_ISL_463054	2020-05-11	Asia / India / Odisha	Human	Original	Illumina NextSeq 550	Reference based	B.1.1
hCoV-19/India/ILSCV16828/2020	EPI_ISL_463055	2020-05-11	Asia / India / Odisha	Human	Original	Illumina NextSeq 550	Reference based	B.1.1
hCoV-19/India/ILSCV17568/2020	EPI_ISL_463056	2020-05-12	Asia / India / Odisha	Human	Original	Illumina NextSeq 550	Reference based	B.1
hCoV-19/India/ILSCV17569/2020	EPI_ISL_463057	2020-05-12	Asia / India / Odisha	Human	Original	Illumina NextSeq 550	Reference based	B.1
hCoV-19/India/ILSCV17741/2020	EPI_ISL_463058	2020-05-13	Asia / India / Odisha	Human	Original	Illumina NextSeq 550	Reference based	A
hCoV-19/India/ILSCV18287/2020	EPI_ISL_463059	2020-05-13	Asia / India / Odisha	Human	Original	Illumina NextSeq 550	Reference based	B.1.1
hCoV-19/India/ILSCV18525/2020	EPI_ISL_463060	2020-05-13	Asia / India / Odisha	Human	Original	Illumina NextSeq 550	Reference based	B.1.113
hCoV-19/India/ILSCV18534/2020	EPI_ISL_463061	2020-05-13	Asia / India / Odisha	Human	Original	Illumina NextSeq 550	Reference based	B.1.113
hCoV-19/India/ILSCV18539/2020	EPI_ISL_463062	2020-05-13	Asia / India / Odisha	Human	Original	Illumina NextSeq 550	Reference based	B.1.113
hCoV-19/India/ILSCV18556/2020	EPI_ISL_463063	2020-05-13	Asia / India / Odisha	Human	Original	Illumina NextSeq 550	Reference based	A.9
hCoV-19/India/ILSCV19048/2020	EPI_ISL_463064	2020-05-16	Asia / India / Odisha	Human	Original	Illumina NextSeq 550	Reference based	A
hCoV-19/India/ILSCV19144/2020	EPI_ISL_463065	2020-05-14	Asia / India / Odisha	Human	Original	Illumina NextSeq 550	Reference based	B.1
hCoV-19/India/ILSCV19156/2020	EPI_ISL_463066	2020-05-14	Asia / India / Odisha	Human	Original	Illumina NextSeq 550	Reference based	B.1
hCoV-19/India/ILSCV19192/2020	EPI_ISL_463067	2020-05-14	Asia / India / Odisha	Human	Original	Illumina NextSeq 550	Reference based	B.6
hCoV-19/India/ILSCV19209/2020	EPI_ISL_463068	2020-05-14	Asia / India / Odisha	Human	Original	Illumina NextSeq 550	Reference based	B.1.1
hCoV-19/India/ILSCV19342/2020	EPI_ISL_463069	2020-05-14	Asia / India / Odisha	Human	Original	Illumina NextSeq 550	Reference based	B.1
hCoV-19/India/ILSCV19346/2020	EPI_ISL_463070	2020-05-14	Asia / India / Odisha	Human	Original	Illumina NextSeq 550	Reference based	B.1
hCoV-19/India/ILSCV19355/2020	EPI_ISL_463071	2020-05-14	Asia / India / Odisha	Human	Original	Illumina NextSeq 550	Reference based	B.1
hCoV-19/India/ILSCV19358/2020	EPI_ISL_463072	2020-05-14	Asia / India / Odisha	Human	Original	Illumina NextSeq 550	Reference based	B.1.1
hCoV-19/India/ILSCV20165/2020	EPI_ISL_463073	2020-05-05	Asia / India / Odisha	Human	Original	Illumina NextSeq 550	Reference based	A
hCoV-19/India/ILSCV20166/2020	EPI_ISL_463074	2020-05-05	Asia / India / Odisha	Human	Original	Illumina NextSeq 550	Reference based	A
hCoV-19/India/ILSCV20407/2020	EPI_ISL_463075	2020-05-15	Asia / India / Odisha	Human	Original	Illumina NextSeq 550	Reference based	B.1.1
hCoV-19/India/ILSCV20408/2020	EPI_ISL_463076	2020-05-15	Asia / India / Odisha	Human	Original	Illumina NextSeq 550	Reference based	B.1.1
hCoV-19/India/ILSCV20410/2020	EPI_ISL_463077	2020-05-15	Asia / India / Odisha	Human	Original	Illumina NextSeq 550	Reference based	B.1
hCoV-19/India/ILSCV20557/2020	EPI_ISL_463078	2020-05-15	Asia / India / Odisha	Human	Original	Illumina NextSeq 550	Reference based	B.1.1
hCoV-19/India/ILSCV20596/2020	EPI_ISL_463079	2020-05-15	Asia / India / Odisha	Human	Original	Illumina NextSeq 550	Reference based	B.1
hCoV-19/India/ILSCV20598/2020	EPI_ISL_463080	2020-05-15	Asia / India / Odisha	Human	Original	Illumina NextSeq 550	Reference based	B.1
hCoV-19/India/ILSCV20600/2020	EPI_ISL_463081	2020-05-15	Asia / India / Odisha	Human	Original	Illumina NextSeq 550	Reference based	B.1
hCoV-19/India/ILSCV20804/2020	EPI_ISL_463082	2020-05-16	Asia / India / Odisha	Human	Original	Illumina NextSeq 550	Reference based	B.1
hCoV-19/India/ILSCV21587/2020	EPI_ISL_463083	2020-05-16	Asia / India / Odisha	Human	Original	Illumina NextSeq 550	Reference based	B.1
hCoV-19/India/ILSCV21602/2020	EPI_ISL_463084	2020-05-16	Asia / India / Odisha	Human	Original	Illumina NextSeq 550	Reference based	B.1.1
hCoV-19/India/ILSCV21721/2020	EPI_ISL_463085	2020-05-16	Asia / India / Odisha	Human	Original	Illumina NextSeq 550	Reference based	B.1.1.32
hCoV-19/India/ILSCV23208/2020	EPI_ISL_463086	2020-05-17	Asia / India / Odisha	Human	Original	Illumina NextSeq 550	Reference based	B.6
hCoV-19/India/ILSCV24694/2020	EPI_ISL_463087	2020-05-18	Asia / India / Odisha	Human	Original	Illumina NextSeq 550	Reference based	B.1.80
hCoV-19/India/ILSCV24917/2020	EPI_ISL_463088	2020-05-18	Asia / India / Odisha	Human	Original	Illumina NextSeq 550	Reference based	B.1
hCoV-19/India/ILSCV24918/2020	EPI_ISL_463089	2020-05-18	Asia / India / Odisha	Human	Original	Illumina NextSeq 550	Reference based	B.1
hCoV-19/India/ILSCV27217/2020	EPI_ISL_463090	2020-05-21	Asia / India / Odisha	Human	Original	Illumina NextSeq 550	Reference based	B.1.1
hCoV-19/India/ILSCV27412/2020	EPI_ISL_463091	2020-05-21	Asia / India / Odisha	Human	Original	Illumina NextSeq 550	Reference based	B.1
hCoV-19/India/ILSCV27419/2020	EPI_ISL_463092	2020-05-21	Asia / India / Odisha	Human	Original	Illumina NextSeq 550	Reference based	B.6
hCoV-19/India/ILSCV28955/2020	EPI_ISL_463093	2020-05-22	Asia / India / Odisha	Human	Original	Illumina NextSeq 550	Reference based	B.1
hCoV-19/India/ILSCV25367/2020	EPI_ISL_481110	2020-05-19	Asia / India / Odisha	Human	Original	Illumina NextSeq 550	Reference based	B.1.1
hCoV-19/India/ILSCV25378/2020	EPI_ISL_481111	2020-05-19	Asia / India / Odisha	Human	Original	Illumina NextSeq 550	Reference based	A
hCoV-19/India/ILSCV25518/2020	EPI_ISL_481112	2020-05-19	Asia / India / Odisha	Human	Original	Illumina NextSeq 550	Reference based	B.1.1.32
hCoV-19/India/ILSCV25524/2020	EPI_ISL_481113	2020-05-19	Asia / India / Odisha	Human	Original	Illumina NextSeq 550	Reference based	B.1.1.32
hCoV-19/India/ILSCV25591/2020	EPI_ISL_481114	2020-05-19	Asia / India / Odisha	Human	Original	Illumina NextSeq 550	Reference based	B.1.1
hCoV-19/India/ILSCV25594/2020	EPI_ISL_481115	2020-05-19	Asia / India / Odisha	Human	Original	Illumina NextSeq 550	Reference based	B.1.1
hCoV-19/India/ILSCV26793/2020	EPI_ISL_481116	2020-05-21	Asia / India / Odisha	Human	Original	Illumina NextSeq 550	Reference based	B
hCoV-19/India/ILSCV26795/2020	EPI_ISL_481117	2020-05-21	Asia / India / Odisha	Human	Original	Illumina NextSeq 550	Reference based	B.1
hCoV-19/India/ILSCV27381/2020	EPI_ISL_481118	2020-05-21	Asia / India / Odisha	Human	Original	Illumina NextSeq 550	Reference based	B.1
hCoV-19/India/ILSCV27406/2020	EPI_ISL_481119	2020-05-21	Asia / India / Odisha	Human	Original	Illumina NextSeq 550	Reference based	B.1.1.32
hCoV-19/India/ILSCV27409/2020	EPI_ISL_481120	2020-05-21	Asia / India / Odisha	Human	Original	Illumina NextSeq 550	Reference based	B.1.1
hCoV-19/India/ILSCV27713/2020	EPI_ISL_481121	2020-05-21	Asia / India / Odisha	Human	Original	Illumina NextSeq 550	Reference based	B.1
hCoV-19/India/ILSCV27725/2020	EPI_ISL_481122	2020-05-21	Asia / India / Odisha	Human	Original	Illumina NextSeq 550	Reference based	B.1
hCoV-19/India/ILSCV27726/2020	EPI_ISL_481123	2020-05-21	Asia / India / Odisha	Human	Original	Illumina NextSeq 550	Reference based	B.1
hCoV-19/India/ILSCV27789/2020	EPI_ISL_481124	2020-05-21	Asia / India / Odisha	Human	Original	Illumina NextSeq 550	Reference based	B.1
hCoV-19/India/ILSCV28062/2020	EPI_ISL_481125	2020-05-21	Asia / India / Odisha	Human	Original	Illumina NextSeq 550	Reference based	A
hCoV-19/India/ILSCV28594/2020	EPI_ISL_481126	2020-05-22	Asia / India / Odisha	Human	Original	Illumina NextSeq 550	Reference based	B.1.1
hCoV-19/India/ILSCV29181/2020	EPI_ISL_481127	2020-05-22	Asia / India / Odisha	Human	Original	Illumina NextSeq 550	Reference based	B.6
hCoV-19/India/ILSCV29215/2020	EPI_ISL_481128	2020-05-23	Asia / India / Odisha	Human	Original	Illumina NextSeq 550	Reference based	B.1
hCoV-19/India/ILSCV29457/2020	EPI_ISL_481129	2020-05-23	Asia / India / Odisha	Human	Original	Illumina NextSeq 550	Reference based	B.1.1
hCoV-19/India/ILSCV29666/2020	EPI_ISL_481130	2020-05-23	Asia / India / Odisha	Human	Original	Illumina NextSeq 550	Reference based	B.1.80
hCoV-19/India/ILSCV29958/2020	EPI_ISL_481131	2020-05-23	Asia / India / Odisha	Human	Original	Illumina NextSeq 550	Reference based	A
hCoV-19/India/ILSCV29959/2020	EPI_ISL_481132	2020-05-23	Asia / India / Odisha	Human	Original	Illumina NextSeq 550	Reference based	B.1.113
hCoV-19/India/ILSCV29960/2020	EPI_ISL_481133	2020-05-23	Asia / India / Odisha	Human	Original	Illumina NextSeq 550	Reference based	B.1.113
hCoV-19/India/ILSCV29961/2020	EPI_ISL_481134	2020-05-23	Asia / India / Odisha	Human	Original	Illumina NextSeq 550	Reference based	B.1.113
hCoV-19/India/ILSCV29962/2020	EPI_ISL_481135	2020-05-23	Asia / India / Odisha	Human	Original	Illumina NextSeq 550	Reference based	B.1.113
hCoV-19/India/ILSCV29971/2020	EPI_ISL_481136	2020-05-23	Asia / India / Odisha	Human	Original	Illumina NextSeq 550	Reference based	A
hCoV-19/India/ILSCV29997/2020	EPI_ISL_481137	2020-05-23	Asia / India / Odisha	Human	Original	Illumina NextSeq 550	Reference based	B.1.1.32
hCoV-19/India/ILSCV30115/2020	EPI_ISL_481138	2020-05-23	Asia / India / Odisha	Human	Original	Illumina NextSeq 550	Reference based	B.1.1.32
hCoV-19/India/ILSCV30140/2020	EPI_ISL_481139	2020-05-23	Asia / India / Odisha	Human	Original	Illumina NextSeq 550	Reference based	B.1.80
hCoV-19/India/ILSCV30141/2020	EPI_ISL_481140	2020-05-23	Asia / India / Odisha	Human	Original	Illumina NextSeq 550	Reference based	B.1.80
hCoV-19/India/ILSCV30163/2020	EPI_ISL_481141	2020-05-23	Asia / India / Odisha	Human	Original	Illumina NextSeq 550	Reference based	B.1.80
hCoV-19/India/ILSCV30167/2020	EPI_ISL_481142	2020-05-23	Asia / India / Odisha	Human	Original	Illumina NextSeq 550	Reference based	B.1.1.32
hCoV-19/India/ILSCV30220/2020	EPI_ISL_481143	2020-05-23	Asia / India / Odisha	Human	Original	Illumina NextSeq 550	Reference based	B.1.80
hCoV-19/India/ILSCV30221/2020	EPI_ISL_481144	2020-05-23	Asia / India / Odisha	Human	Original	Illumina NextSeq 550	Reference based	B.1.80
hCoV-19/India/ILSCV30273/2020	EPI_ISL_481145	2020-05-23	Asia / India / Odisha	Human	Original	Illumina NextSeq 550	Reference based	B.1
hCoV-19/India/ILSCV30442/2020	EPI_ISL_481146	2020-05-24	Asia / India / Odisha	Human	Original	Illumina NextSeq 550	Reference based	B.1.1
hCoV-19/India/ILSCV31185/2020	EPI_ISL_481147	2020-05-24	Asia / India / Odisha	Human	Original	Illumina NextSeq 550	Reference based	B.1.1
hCoV-19/India/ILSCV31447/2020	EPI_ISL_481148	2020-05-26	Asia / India / Odisha	Human	Original	Illumina NextSeq 550	Reference based	B.1.113
hCoV-19/India/ILSCV31650/2020	EPI_ISL_481149	2020-05-26	Asia / India / Odisha	Human	Original	Illumina NextSeq 550	Reference based	B.1.1
hCoV-19/India/ILSCV31684/2020	EPI_ISL_481150	2020-05-26	Asia / India / Odisha	Human	Original	Illumina NextSeq 550	Reference based	A
hCoV-19/India/ILSCV31693/2020	EPI_ISL_481151	2020-05-26	Asia / India / Odisha	Human	Original	Illumina NextSeq 550	Reference based	A
hCoV-19/India/ILSCV31694/2020	EPI_ISL_481152	2020-05-26	Asia / India / Odisha	Human	Original	Illumina NextSeq 550	Reference based	A
hCoV-19/India/ILSCV31984/2020	EPI_ISL_481153	2020-05-29	Asia / India / Odisha	Human	Original	Illumina NextSeq 550	Reference based	B.1
hCoV-19/India/ILSCV32007/2020	EPI_ISL_481154	2020-05-29	Asia / India / Odisha	Human	Original	Illumina NextSeq 550	Reference based	B.1.36
hCoV-19/India/ILSCV32142/2020	EPI_ISL_481155	2020-05-30	Asia / India / Odisha	Human	Original	Illumina NextSeq 550	Reference based	B.1
hCoV-19/India/ILSCV32465/2020	EPI_ISL_481156	2020-05-30	Asia / India / Odisha	Human	Original	Illumina NextSeq 550	Reference based	B
hCoV-19/India/ILSCV32485/2020	EPI_ISL_481157	2020-06-02	Asia / India / Odisha	Human	Original	Illumina NextSeq 550	Reference based	B.1
hCoV-19/India/ILSCV32486/2020	EPI_ISL_481158	2020-06-02	Asia / India / Odisha	Human	Original	Illumina NextSeq 550	Reference based	B.1
hCoV-19/India/ILSCV32593/2020	EPI_ISL_481159	2020-06-03	Asia / India / Odisha	Human	Original	Illumina NextSeq 550	Reference based	B.1.1
hCoV-19/India/ILSCV32652/2020	EPI_ISL_481160	2020-06-03	Asia / India / Odisha	Human	Original	Illumina NextSeq 550	Reference based	B.1
hCoV-19/India/ILSCV32656/2020	EPI_ISL_481161	2020-06-03	Asia / India / Odisha	Human	Original	Illumina NextSeq 550	Reference based	B.1.1
hCoV-19/India/ILSCV32670/2020	EPI_ISL_481162	2020-06-03	Asia / India / Odisha	Human	Original	Illumina NextSeq 550	Reference based	B
hCoV-19/India/ILSCV32814/2020	EPI_ISL_481163	2020-06-04	Asia / India / Odisha	Human	Original	Illumina NextSeq 550	Reference based	B.1.1.32
hCoV-19/India/ILSCV32815/2020	EPI_ISL_481164	2020-06-04	Asia / India / Odisha	Human	Original	Illumina NextSeq 550	Reference based	B.1.1.32
hCoV-19/India/ILSCV32816/2020	EPI_ISL_481165	2020-06-04	Asia / India / Odisha	Human	Original	Illumina NextSeq 550	Reference based	B.1.1.32
hCoV-19/India/ILSCV32817/2020	EPI_ISL_481166	2020-06-04	Asia / India / Odisha	Human	Original	Illumina NextSeq 550	Reference based	B.1.1.32
hCoV-19/India/ILSCV32866/2020	EPI_ISL_481167	2020-06-04	Asia / India / Odisha	Human	Original	Illumina NextSeq 550	Reference based	B.1
hCoV-19/India/ILSCV32870/2020	EPI_ISL_481168	2020-06-04	Asia / India / Odisha	Human	Original	Illumina NextSeq 550	Reference based	B.1.1
hCoV-19/India/ILSCV32872/2020	EPI_ISL_481169	2020-06-04	Asia / India / Odisha	Human	Original	Illumina NextSeq 550	Reference based	B.1.1
hCoV-19/India/ILSCV32879/2020	EPI_ISL_481170	2020-06-05	Asia / India / Odisha	Human	Original	Illumina NextSeq 550	Reference based	B.1
hCoV-19/India/ILSCV32889/2020	EPI_ISL_481171	2020-06-05	Asia / India / Odisha	Human	Original	Illumina NextSeq 550	Reference based	B.1.1
hCoV-19/India/ILSCV32892/2020	EPI_ISL_481172	2020-06-05	Asia / India / Odisha	Human	Original	Illumina NextSeq 550	Reference based	B.1.1
hCoV-19/India/ILSCV32893/2020	EPI_ISL_481173	2020-06-05	Asia / India / Odisha	Human	Original	Illumina NextSeq 550	Reference based	B.1.1
hCoV-19/India/ILSCV32895/2020	EPI_ISL_481174	2020-06-05	Asia / India / Odisha	Human	Original	Illumina NextSeq 550	Reference based	B.1.1
hCoV-19/India/ILSCV32896/2020	EPI_ISL_481175	2020-06-05	Asia / India / Odisha	Human	Original	Illumina NextSeq 550	Reference based	B.1.1
hCoV-19/India/ILSCV32898/2020	EPI_ISL_481176	2020-06-05	Asia / India / Odisha	Human	Original	Illumina NextSeq 550	Reference based	B.1.1
hCoV-19/India/ILSCV32899/2020	EPI_ISL_481177	2020-06-05	Asia / India / Odisha	Human	Original	Illumina NextSeq 550	Reference based	B.1.1
hCoV-19/India/ILSCV33971/2020	EPI_ISL_481178	2020-06-08	Asia / India / Odisha	Human	Original	Illumina NextSeq 550	Reference based	B.1.1
hCoV-19/India/ILSCV33972/2020	EPI_ISL_481179	2020-06-08	Asia / India / Odisha	Human	Original	Illumina NextSeq 550	Reference based	B.1.1
hCoV-19/India/ILSCV33982/2020	EPI_ISL_481180	2020-06-08	Asia / India / Odisha	Human	Original	Illumina NextSeq 550	Reference based	B.1.1
hCoV-19/India/ILSCV33983/2020	EPI_ISL_481181	2020-06-08	Asia / India / Odisha	Human	Original	Illumina NextSeq 550	Reference based	B.1.26
hCoV-19/India/ILSCV34478/2020	EPI_ISL_481182	2020-06-09	Asia / India / Odisha	Human	Original	Illumina NextSeq 550	Reference based	B.1.1
hCoV-19/India/ILSCV34479/2020	EPI_ISL_481183	2020-06-09	Asia / India / Odisha	Human	Original	Illumina NextSeq 550	Reference based	B.1.26
hCoV-19/India/ILSCV34480/2020	EPI_ISL_481184	2020-06-09	Asia / India / Odisha	Human	Original	Illumina NextSeq 550	Reference based	B.1.1
hCoV-19/India/ILSCV34933/2020	EPI_ISL_481185	2020-06-10	Asia / India / Odisha	Human	Original	Illumina NextSeq 550	Reference based	B.1
hCoV-19/India/ILSCV34939/2020	EPI_ISL_481186	2020-06-10	Asia / India / Odisha	Human	Original	Illumina NextSeq 550	Reference based	B.1.1
hCoV-19/India/ILSCV35141/2020	EPI_ISL_481187	2020-06-10	Asia / India / Odisha	Human	Original	Illumina NextSeq 550	Reference based	B.1.1
hCoV-19/India/ILSCV35308/2020	EPI_ISL_481188	2020-06-10	Asia / India / Odisha	Human	Original	Illumina NextSeq 550	Reference based	B.1.1
hCoV-19/India/ILSCV35317/2020	EPI_ISL_481189	2020-06-10	Asia / India / Odisha	Human	Original	Illumina NextSeq 550	Reference based	B.1.1
hCoV-19/India/ILSCV35333/2020	EPI_ISL_481190	2020-06-10	Asia / India / Odisha	Human	Original	Illumina NextSeq 550	Reference based	B.1.1
hCoV-19/India/ILSCV35350/2020	EPI_ISL_481191	2020-06-10	Asia / India / Odisha	Human	Original	Illumina NextSeq 550	Reference based	B.1.1
hCoV-19/India/ILSCV35351/2020	EPI_ISL_481192	2020-06-10	Asia / India / Odisha	Human	Original	Illumina NextSeq 550	Reference based	B.1.1
hCoV-19/India/ILSCV35353/2020	EPI_ISL_481193	2020-06-10	Asia / India / Odisha	Human	Original	Illumina NextSeq 550	Reference based	B.1.1
hCoV-19/India/ILSCV35366/2020	EPI_ISL_481194	2020-06-10	Asia / India / Odisha	Human	Original	Illumina NextSeq 550	Reference based	B.1.1
hCoV-19/India/ILSCV35376/2020	EPI_ISL_481195	2020-06-10	Asia / India / Odisha	Human	Original	Illumina NextSeq 550	Reference based	B.1.1
hCoV-19/India/ILSCV35456/2020	EPI_ISL_481196	2020-06-10	Asia / India / Odisha	Human	Original	Illumina NextSeq 550	Reference based	B.1
hCoV-19/India/ILSCV35457/2020	EPI_ISL_481197	2020-06-10	Asia / India / Odisha	Human	Original	Illumina NextSeq 550	Reference based	B.1
hCoV-19/India/ILSCV35461/2020	EPI_ISL_481198	2020-06-10	Asia / India / Odisha	Human	Original	Illumina NextSeq 550	Reference based	B.1
hCoV-19/India/ILSCV35475/2020	EPI_ISL_481199	2020-06-10	Asia / India / Odisha	Human	Original	Illumina NextSeq 550	Reference based	B.1
hCoV-19/India/ILSCV35476/2020	EPI_ISL_481200	2020-06-10	Asia / India / Odisha	Human	Original	Illumina NextSeq 550	Reference based	B.1
hCoV-19/India/ILSCV35482/2020	EPI_ISL_481201	2020-06-11	Asia / India / Odisha	Human	Original	Illumina NextSeq 550	Reference based	B.1
hCoV-19/India/ILSCV35574/2020	EPI_ISL_481202	2020-06-11	Asia / India / Odisha	Human	Original	Illumina NextSeq 550	Reference based	B.1.1.32
hCoV-19/India/ILSCV35614/2020	EPI_ISL_481203	2020-06-12	Asia / India / Odisha	Human	Original	Illumina NextSeq 550	Reference based	B.1.26
hCoV-19/India/ILSCV35615/2020	EPI_ISL_481204	2020-06-12	Asia / India / Odisha	Human	Original	Illumina NextSeq 550	Reference based	B.1.26
hCoV-19/India/ILSCV35750/2020	EPI_ISL_481205	2020-06-12	Asia / India / Odisha	Human	Original	Illumina NextSeq 550	Reference based	B.1.1
